# Supplementary material
Source: PubMed Central journal article supplement (PMC3163955)
Supplement: JCI46028sd.pdf [file JCI46028sd.pdf]

## Supplemental Materials

### IgE stimulates human and mouse arterial cell apoptosis and cytokine expression and promotes atherogenesis in *Apoe*<sup>-/-</sup> mice

Jing Wang, Xiang Cheng, Mei-Xiang Xiang, Mervi Alanne-Kinnunen, Jian-An Wang, Han Chen, Aina He, Xinghui Sun, Yan Lin, Ting-Ting Tang, Xin Tu, Sara Sjöberg, Galina K. Sukhova, Yu-Hua Liao, Daniel H. Conrad, Lunyin Yu, Toshiaki Kawakami, Petri T. Kovanen, Peter Libby, Guo-Ping Shi

### Supplemental Tables

**Supplemental Table 1.** Clinical data and serum IgE comparisons between patients with and without coronary heart disease (CHD) from Eastern China.

| Variables                             | non-CHD (n=93)<br>(Mean ± S.E.) |      | CHD (n=147)<br>(Mean ± S.E.) |      | <i>t</i> value   | <i>P</i> value* |
|---------------------------------------|---------------------------------|------|------------------------------|------|------------------|-----------------|
| Age (year)                            | 58.45±1.12                      |      | 65.79±0.81                   |      | 5.408            | <0.001          |
| Body-mass index (kg/mm <sup>2</sup> ) | 23.28±0.41                      |      | 23.70±0.26                   |      | 0.591            | 0.357           |
| Fasting glucose (mg/dL)               | 98.02±2.03                      |      | 101.17±2.37                  |      | 1.011            | 0.313           |
| Total cholesterol (mg/dL)             | 161.60±3.28                     |      | 163.01±3.80                  |      | 0.281            | 0.779           |
| Triglyceride (mg/dL)                  | 156.94±10.84                    |      | 170.63±12.46                 |      | 0.765            | 0.445           |
| High-density lipoprotein (mg/dL)      | 51.05±1.41                      |      | 47.24±1.01                   |      | -2.245           | 0.026           |
| Low-density lipoprotein (mg/dL)       | 91.15±2.81                      |      | 94.48±3.06                   |      | 0.803            | 0.423           |
| Immunoglobulin E (IU/mL)              | 62.21±5.69                      |      | 99.55±9.84                   |      | 3.286            | 0.001           |
|                                       | Non-CHD (n=93)                  |      | CHD (n=147)                  |      | <i>P</i> value** |                 |
|                                       | 0***                            | 1*** | 0***                         | 1*** |                  |                 |
| Sex                                   | 40                              | 53   | 42                           | 105  |                  | 0.026           |
| Smoking                               | 62                              | 31   | 91                           | 56   |                  | 0.493           |
| Hypertension                          | 34                              | 59   | 48                           | 99   |                  | 0.577           |
| Diabetes mellitus                     | 84                              | 9    | 116                          | 31   |                  | 0.022           |

\*Independent sample *t* test. \*\*Fisher's exact test. *P*<0.05 was considered statistically significant. \*\*\*Sex: 0-female, 1-male; Smoking: 0-non-smoker, 1-smoker; Hypertension: 0-no, 1-yes; Diabetes mellitus: 0-no, 1-yes.

**Supplemental Table 2.** Clinical data and serum IgE comparisons among CHD subgroups and non-CHD subjects from Eastern China.

| Variables                             | non-CHD (n=93) |    | AMI (n=33)       |    | UAP (n=83)      |    | SAP (n=31)      |    | P value <sup>d</sup>   |
|---------------------------------------|----------------|----|------------------|----|-----------------|----|-----------------|----|------------------------|
| Age (year)                            | 58.45 ± 1.12   |    | 69.88 ± 1.83**   |    | 65.23 ± 0.96**# |    | 62.94 ± 1.95### |    | 0.000 <sup>a</sup>     |
| Body-mass index (kg/mm <sup>2</sup> ) | 23.45 ± 0.35   |    | 22.75 ± 0.53     |    | 23.63 ± 0.34    |    | 24.92 ± 0.60    |    | 0.059 <sup>a</sup>     |
| Fasting glucose (mg/dL)               | 98.02 ± 2.03   |    | 116.17 ± 6.52    |    | 97.23 ± 2.57#   |    | 95.06 ± 4.58#   |    | 0.004 <sup>b</sup>     |
| Total cholesterol (mg/dL)             | 161.60 ± 3.28  |    | 155.85 ± 5.27    |    | 164.55 ± 5.49   |    | 167.18 ± 9.27   |    | 0.843 <sup>b</sup>     |
| Triglyceride (mg/dL)                  | 156.94 ± 10.84 |    | 129.88 ± 8.42    |    | 176.21 ± 13.01  |    | 203.11 ± 48.81  |    | 0.233 <sup>a</sup>     |
| High-density lipoprotein (mg/dL)      | 51.05 ± 1.41   |    | 47.64 ± 2.07     |    | 46.65 ± 1.30    |    | 48.39 ± 2.54    |    | 0.145 <sup>a</sup>     |
| Low-density lipoprotein (mg/dL)       | 91.15 ± 2.81   |    | 90.85 ± 4.45     |    | 96.14 ± 4.45    |    | 94.14 ± 7.20    |    | 0.889 <sup>a</sup>     |
| Immunoglobulin E (IU/mL)              | 62.21 ± 5.69   |    | 133.63 ± 26.28** |    | 97.72 ± 12.41*▲ |    | 68.18 ± 15.76## |    | 0.003 <sup>a</sup>     |
|                                       | non-CHD (n=93) |    | AMI (n=33)       |    | UAP (n=83)      |    | SAP (n=31)      |    | P value <sup>c,d</sup> |
|                                       | 0              | 1  | 0                | 1  | 0               | 1  | 0               | 1  |                        |
| Sex                                   | 40             | 53 | 13               | 20 | 21              | 62 | 8               | 23 | 0.058                  |
| Smoking                               | 62             | 31 | 19               | 14 | 52              | 31 | 20              | 11 | 0.816                  |
| Hypertension                          | 34             | 59 | 12               | 21 | 26              | 57 | 10              | 21 | 0.884                  |
| Diabetes mellitus                     | 84             | 9  | 25               | 8  | 67              | 16 | 24              | 7  | 0.121                  |

a: one way ANOVA LSD test (normal distribution and homogeneity of variance) ; b: Kruskal-Wallis test (abnormal distribution or heterogeneity of variance); c. Pearson Chi-Square test. d:  $P < 0.05$  was considered statistically significant between the groups.

\*  $P < 0.05$  vs. non-CHD; \*\*  $P < 0.01$  vs. non-CHD; #  $P < 0.05$  vs. AMI; ##  $P < 0.01$  vs. AMI; ▲:  $P < 0.05$ , vs. SAP

**Supplemental Table 3.** Variables associated with serum IgE in all subjects (n=240) from Eastern China.

|                                       | Correlation Coefficient | t value | P value |
|---------------------------------------|-------------------------|---------|---------|
| Age (year)                            | 0.027                   |         | 0.676*  |
| Sex                                   | -1.669                  | 0.096** |         |
| Body-mass index (kg/mm <sup>2</sup> ) | 0.000                   |         | 0.996*  |
| Hypertension                          | 0.334                   | 0.739** |         |
| Diabetes mellitus                     | -1.292                  | 0.203** |         |
| Smoking                               | -0.772                  | 0.441** |         |
| Fasting glucose (mg/dL)               | 0.218                   |         | 0.001*  |
| Total cholesterol (mg/dL)             | 0.108                   |         | 0.104*  |
| Triglyceride (mg/dL)                  | -0.037                  |         | 0.575*  |
| High-density lipoprotein (mg/dL)      | 0.027                   |         | 0.686*  |
| Low-density lipoprotein (mg/dL)       | 0.121                   |         | 0.068*  |

\* Pearson's correlation test; \*\*Independent sample t test.

**Supplemental Table 4.** Mouse serum lipid profiles.

| Genotype                                                       | Total cholesterol (mg/dL) | HDL (mg/dL)  | Triglyceride (mg/dL) | LDL (mg/dL)      |
|----------------------------------------------------------------|---------------------------|--------------|----------------------|------------------|
| <i>Apoe</i> <sup>-/-</sup> <i>Fcer1a</i> <sup>+/+</sup> (n=18) | 1449.49 ± 85.65           | 35.38 ± 1.33 | 230.77 ± 17.89       | 1367.96 ± 82.69  |
| <i>Apoe</i> <sup>-/-</sup> <i>Fcer1a</i> <sup>-/-</sup> (n=11) | 1512.44 ± 140.25          | 41.08 ± 1.85 | 282.42 ± 30.57       | 1414.88 ± 135.61 |
| P value*                                                       | 0.589                     | 0.019*       | 0.080                | 0.653            |

\*Mann-Whitney U test,  $P < 0.05$  is considered statistically significant.

## Supplemental Figures

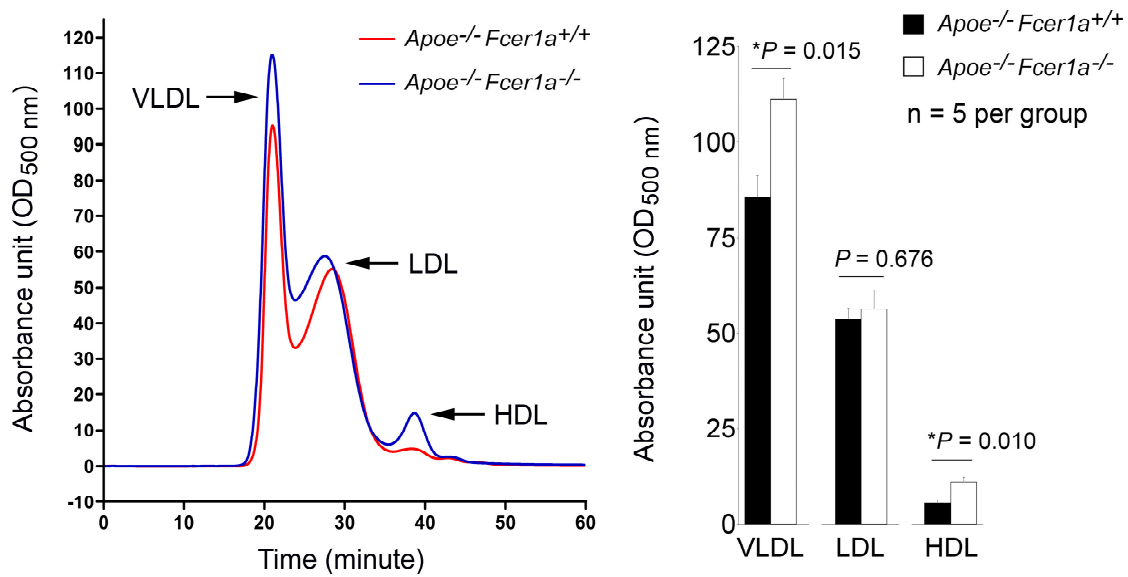

**Supplemental Figure 1.** FPLC analysis of serum samples from *Apoe*<sup>-/-</sup> *Fcer1a*<sup>+/+</sup> mice and *Apoe*<sup>-/-</sup> *Fcer1a*<sup>-/-</sup> mice after 12 weeks on a Western diet.  $P < 0.05$  was considered statistically significant, Mann-Whitney *U* test. Representative data are shown to the left.

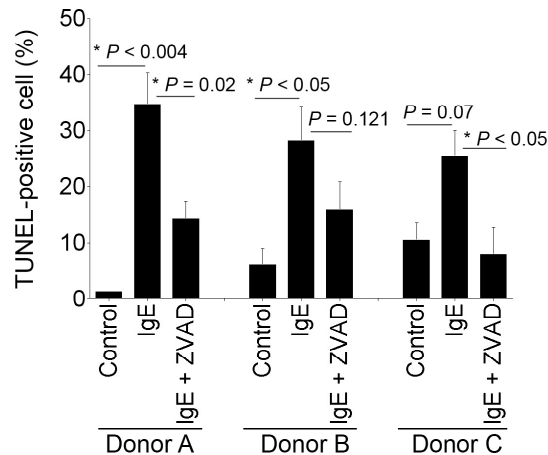

**Supplemental Figure 2.** IgE induces human monocyte-derived macrophage apoptosis. Macrophages from three donors respond to IgE (SPE-7, 50  $\mu$ g/mL) and undergo apoptosis. Caspase inhibitor ZVAD-FMK (20  $\mu$ M) efficiently blocks IgE-induced macrophage apoptosis, although macrophages from different donors respond differently. \* $P < 0.05$  is considered statistically significant, non-parametric Mann-Whitney test.

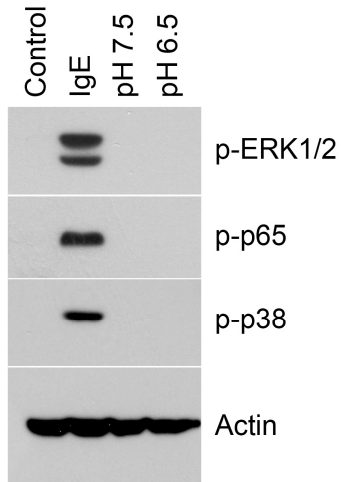

**Supplemental Figure 3.** pH effects on macrophage signaling molecule activation. Culturing human macrophages in pH6.5 or pH7.5 media did not cause MAPK (ERK1/2 and p38) or MF-kB phosphorylation, as detected by immunoblot analysis. IgE (50  $\mu\text{g}/\text{mL}$ ) was used as a positive control, and actin blot was used as a protein loading control.

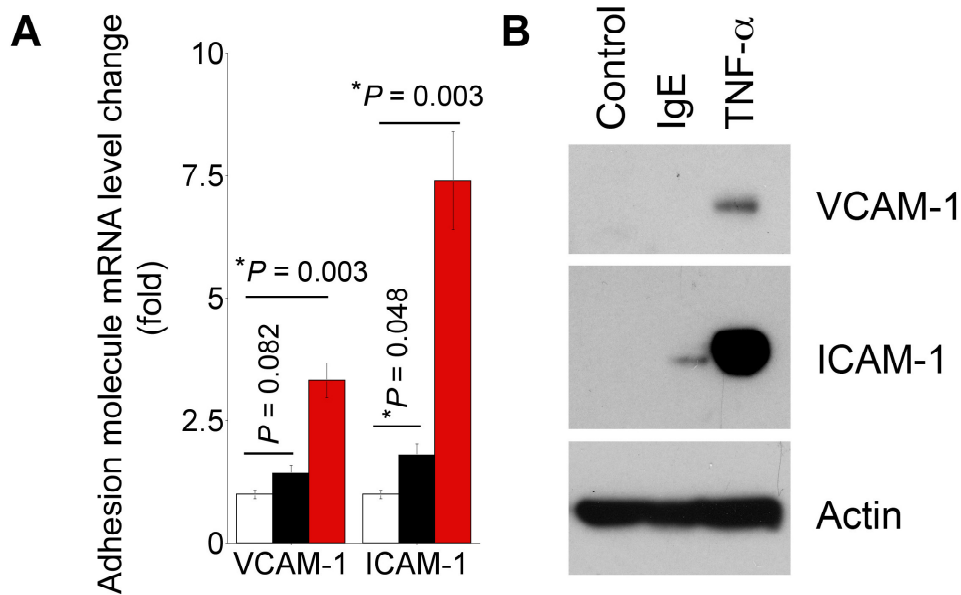

**Supplemental Figure 4.** Human endothelial cell adhesion molecule expression after stimulation with purified IgE (50  $\mu\text{g}/\text{mL}$ ) or recombinant TNF- $\alpha$  (10 ng/mL). **A.** RT-PCR to detect mRNA levels. **B.** Immunoblot analysis to detect protein levels. TNF- $\alpha$  was used as a positive control, and actin blot was used to ensure equal protein loading.
